# Supplementary material
Source: MDPI journal article supplement (https://www.mdpi.com/2624-8549/5/4/159)
Supplement: s1 [file s1]

# Condensed DNA Nanosphere for DNA Origami Cryptography

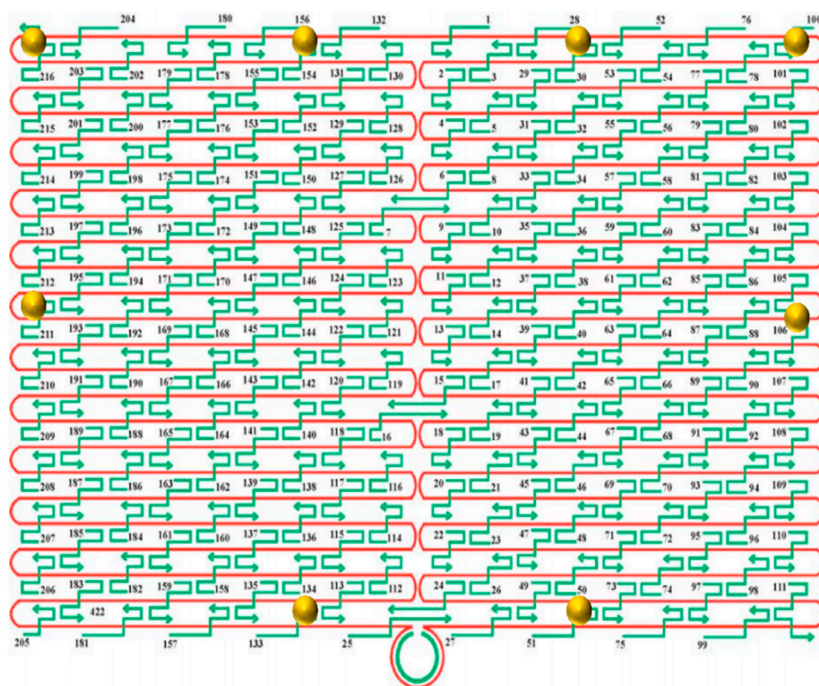

Figure S1. Schematic diagram of the formation of pattern D on DNA origami

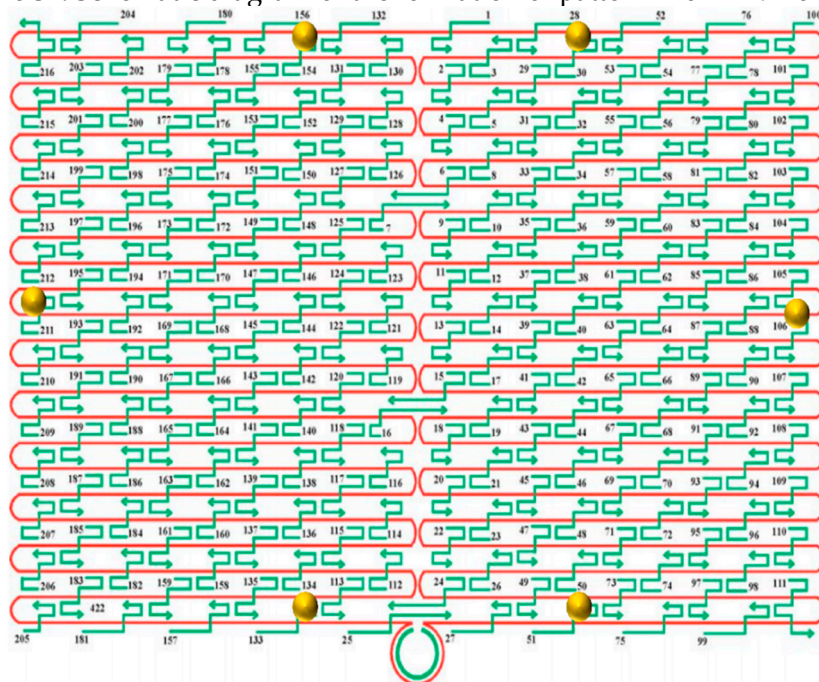

Figure S2. Schematic diagram of the formation of pattern O on DNA origami

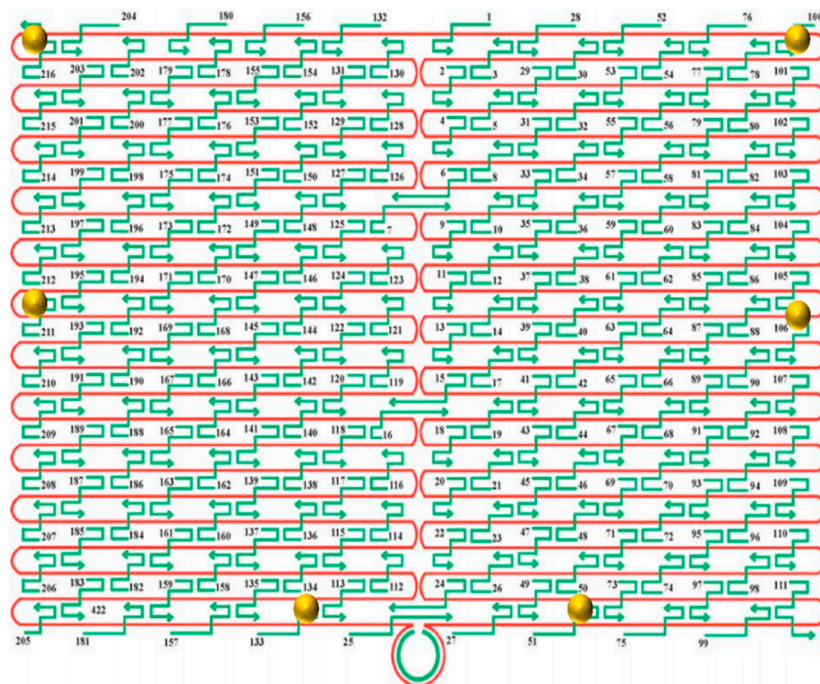

Figure S3. Schematic diagram of the formation of pattern C on DNA origami

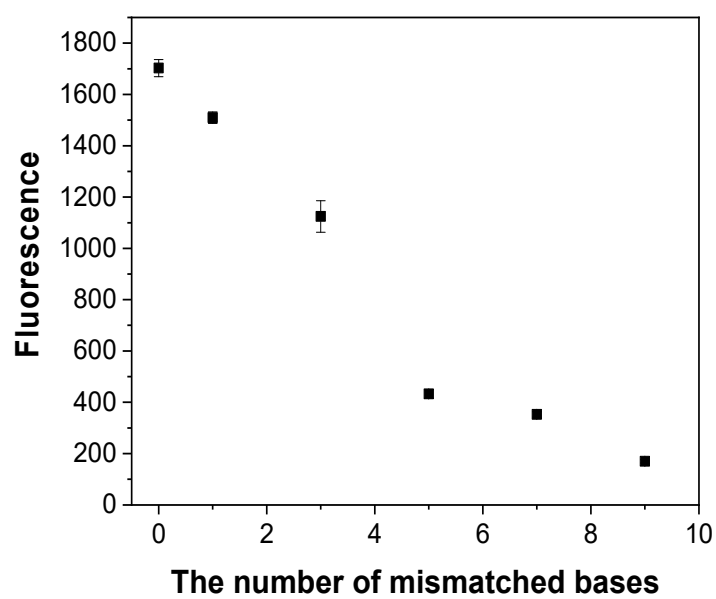

Figure S4. Test the sensitivity of SYBR Green I dye to single-stranded DNA base damage. There was a significant decrease in fluorescence intensity for mismatches of 1, 3, 5, 7, and 9 bases.

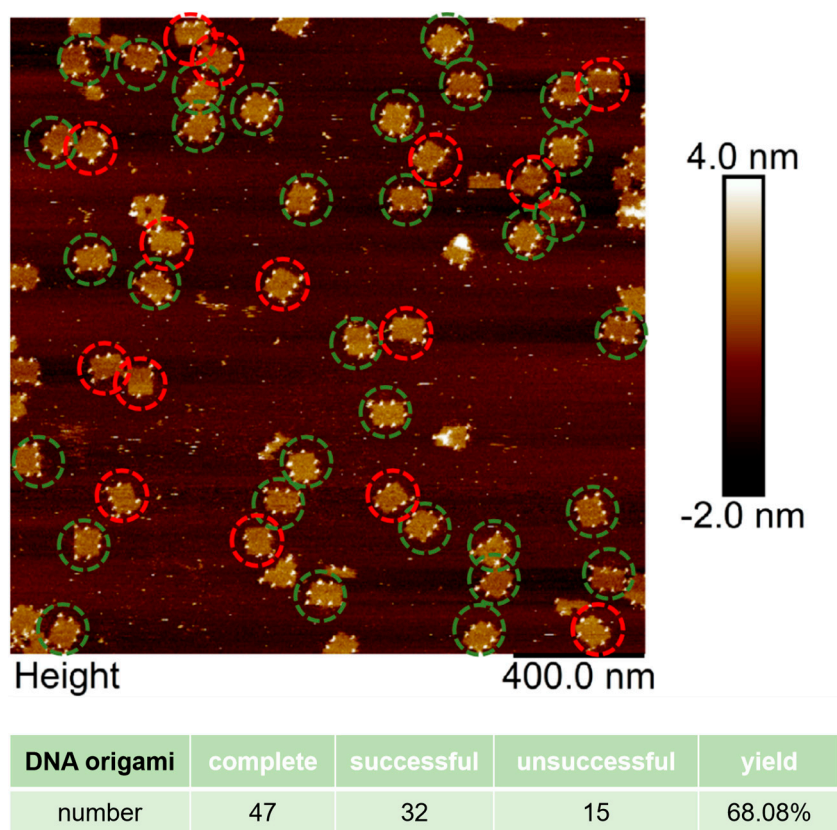

Figure S5. Pattern D revealed by DNA origami after release from the DNA nanospheres without silica coating, and its yield.

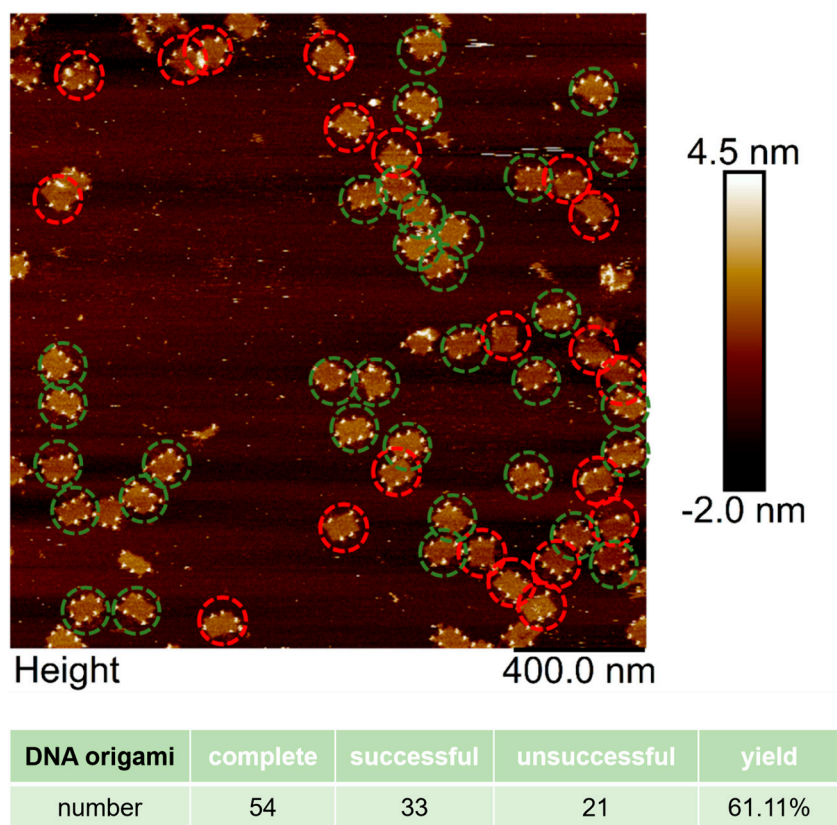

Figure S6. Pattern D revealed by DNA origami after release from the DNA nanospheres with silica coating, and its yield.



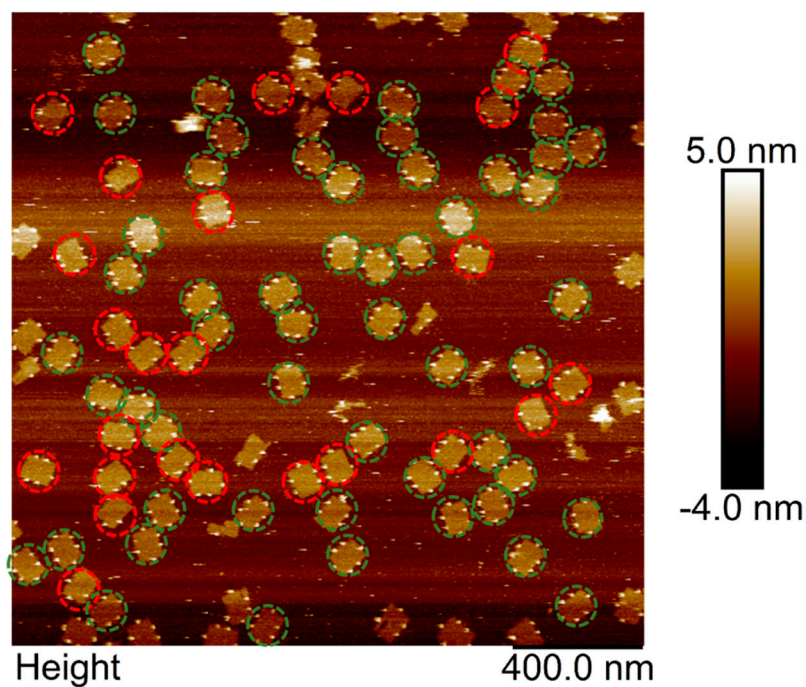

| DNA origami | complete | successful | unsuccessful | yield  |
|-------------|----------|------------|--------------|--------|
| number      | 78       | 54         | 24           | 69.23% |

Figure S7. Pattern O revealed by DNA origami after release from the DNA nanospheres without silica coating, and its yield.

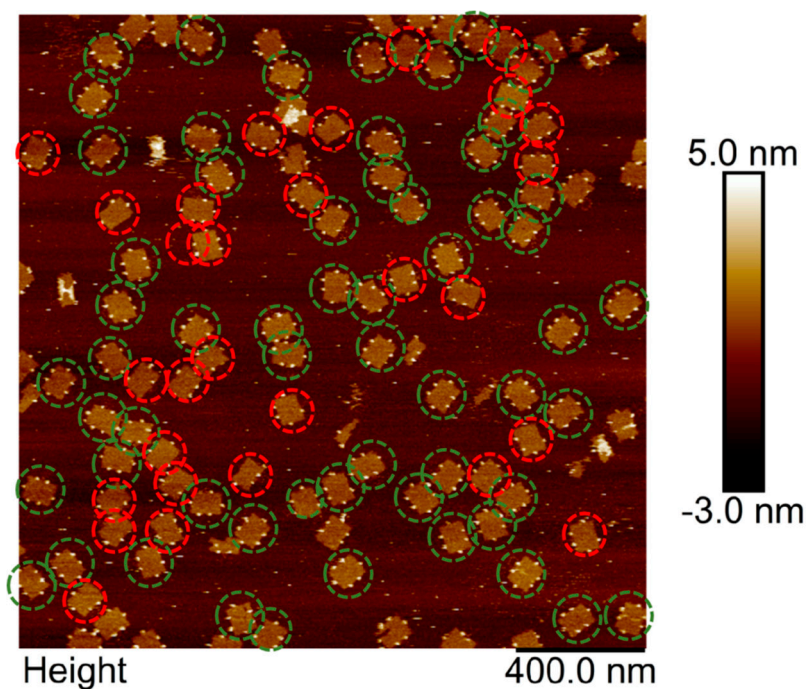

| DNA origami | complete | successful | unsuccessful | yield  |
|-------------|----------|------------|--------------|--------|
| number      | 84       | 59         | 29           | 67.04% |

Figure S8. Pattern O revealed by DNA origami after release from the DNA nanospheres with silica coating, and its yield.

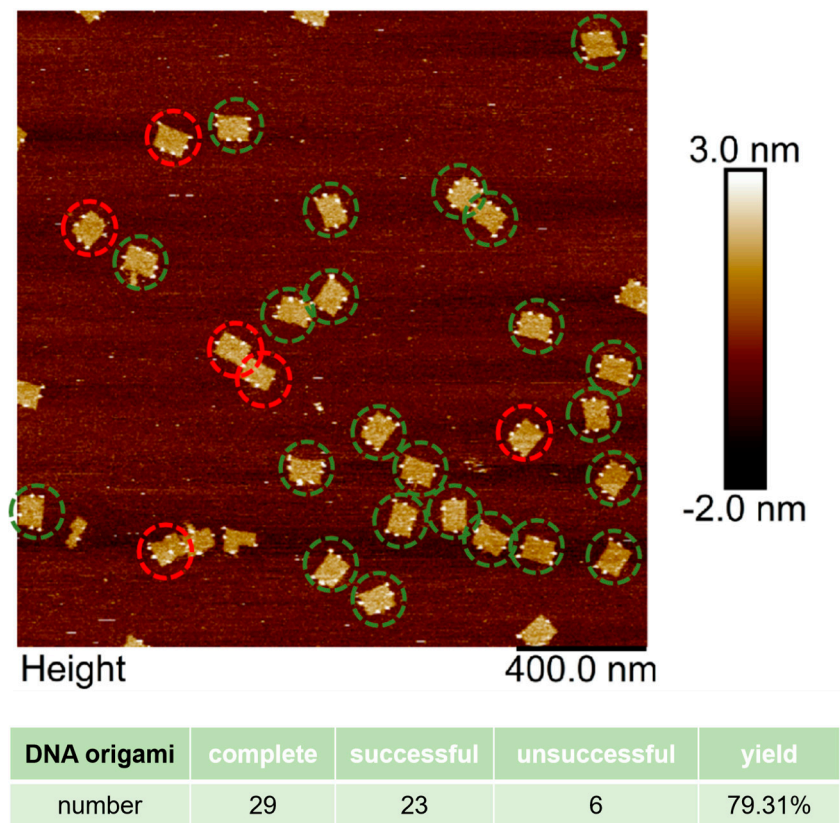

Figure S9. Pattern C revealed by DNA origami after release from the DNA nanospheres without silica coating, and its yield.

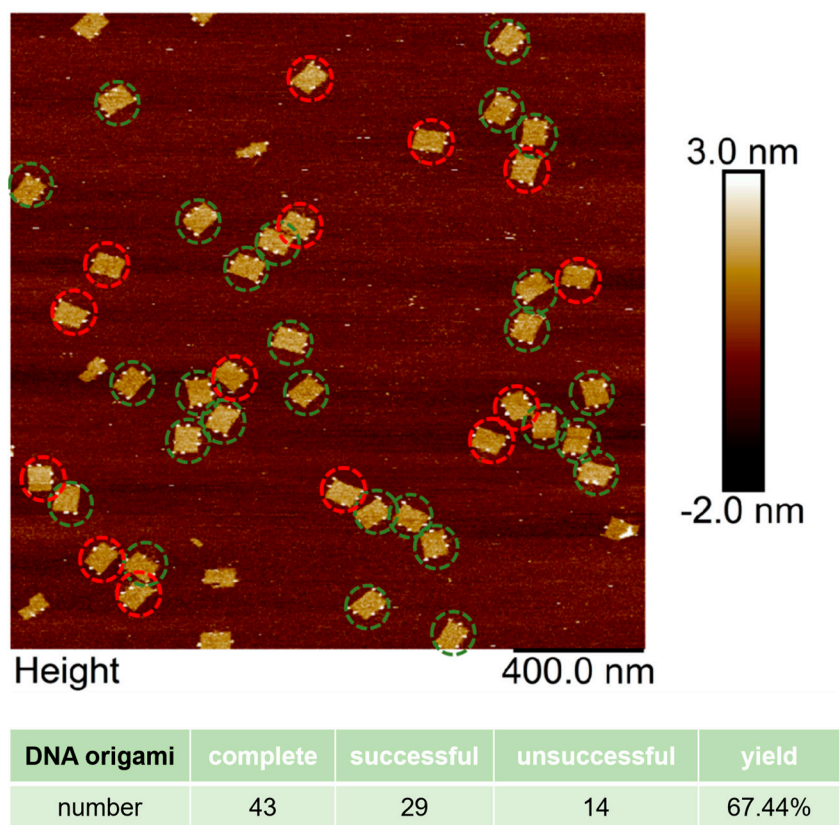

Figure S10. Pattern C revealed by DNA origami after release from the DNA nanospheres with silica coating, and its yield.

Table S1. DNA origami sequence

|    |                                    |
|----|------------------------------------|
| 1  | CAAGCCCAATAGGAAC CCATGTACAAACAGTT  |
| 2  | AATGCCCCGTAAACAGT GCCCGTATCTCCCTCA |
| 3  | TGCCTTGACTGCCTAT TTCGGAACAGGGATAG  |
| 4  | GAGCCGCCCCACCACC GGAACCGCGACGGAAA  |
| 5  | AACCAGAGACCCTCAG AACCGCCAGGGGTCAG  |
| 6  | TTATTCATAGGGAAGG TAAATATT CATTCACT |
| 7  | CATAACCCGAGGCATA GTAAGAGC TTTTAAAG |
| 8  | ATTGAGGGTAAAGGTG AATTATCAATCACCGG  |
| 9  | AAAAGTAATATCTTAC CGAAGCCCTTCCAGAG  |
| 10 | GCAATAGCGCAGATAG CCGAACAATTCAACCG  |
| 11 | CCTAATTTACGCTAAC GAGCGTCTAATCAATA  |
| 12 | TCTTACCAGCCAGTTA CAAAATAAATGAAATA  |
| 13 | ATCGGCTGCGAGCATG TAGAAACCTATCATAT  |
| 14 | CTAATTTATCTTTCCT TATCATTATCCTGAA   |
| 15 | GCGTTATAGAAAAAGC CTGTTTAG AAGGCCGG |
| 16 | GCTCATTTTCGCATTA AATTTTGG AGCTTAGA |
| 17 | AATTACTACAAATTCT TACCAGTAATCCCATC  |
| 18 | TTAAGACGTTGAAAAC ATAGCGATAACAGTAC  |
| 19 | TAGAATCCCTGAGAAG AGTCAATAGGAATCAT  |
| 20 | CTTTTACACAGATGAA TATACAGTAAACAATT  |
| 21 | TTTAACGTTCTGGGAGA AACAATAATTTTCCCT |
| 22 | CGACAACCTAAGTATTA GACTTTACAATACCGA |
| 23 | GGATTTAGCGTATTAA ATCCTTTGTTTTCAGG  |
| 24 | ACGAACCAAAACATCG CCATTAAA TGGTGGTT |
| 25 | GAACGTGGCGAGAAAG GAAGGGAA CAACTAT  |
| 26 | TAGCCCTACCAGCAGA AGATAAAAAACATTTGA |
| 27 | CGGCCTTGCTGGTAAT ATCCAGAACGAACTGA  |
| 28 | CTCAGAGCCACCACCC TCATTTTCTATTATT   |
| 29 | CTGAAACAGGTAATAA GTTTTAAACCCTCAGA  |
| 31 | GCCACCACTCTTTTCA TAATCAAACCGTCACC  |
| 32 | GTTTGCCACCTCAGAG CCGCCACCGATACAGG  |
| 33 | GACTTGAGAGACAAAA GGGCGACAAGTTACCA  |
| 34 | AGCGCCAACCATTTGG GAATTAGATTATTAGC  |
| 35 | GAAGGAAAATAAGAGC AAGAAACAACAGCCAT  |
| 36 | GCCCAATACCGAGGAA ACGCAATAGGTTTACC  |
| 37 | ATTATTTAACCAGCT ACAATTTTCAAGAACG   |
| 38 | TATTTTGCTCCCAATC CAAATAAGTGAGTTAA  |
| 39 | GGTATTAAGAACAAGA AAAATAATTAAAGCCA  |
| 40 | TAAGTCCTACCAAGTA CCGCACTCTTAGTTGC  |
| 41 | ACGCTCAAAAATAAGAA TAAACACCGTGAATTT |
| 42 | AGGCGTTACAGTAGGG CTTAATTGACAATAGA  |

|    |                                    |
|----|------------------------------------|
| 43 | ATCAAAATCGTCGCTA TTAATTAACGGATTTCG |
| 44 | CTGTAAATCATAGGTC TGAGAGACGATAAATA  |
| 45 | CCTGATTGAAAGAAAT TGCGTAGACCCGAACG  |
| 46 | ACAGAAATCTTTGAAT ACCAAGTTCCTTGCTT  |
| 47 | TTATTAATGCCGTCAA TAGATAATCAGAGGTG  |
| 48 | AGATTAGATTTAAAAG TTTGAGTACACGTAAA  |
| 49 | AGGCGGTCATTAGTCT TTAATGCGCAATATTA  |
| 50 | GAATGGCTAGTATTAA CACCGCCTCAACTAAT  |
| 52 | CCCTCAGAACCGCCAC CCTCAGAACTGAGACT  |
| 53 | CCTCAAGAATACATGG CTTTTGATAGAACCAC  |
| 54 | TAAGCGTCGAAGGATT AGGATTAGTACCGCCA  |
| 55 | CACCAGAGTTCGGTCA TAGCCCCCGCCAGCAA  |
| 56 | TCGGCATTCCGCCGCC AGCATTGACGTTCCAG  |
| 57 | AATCACCAAATAGAAA ATTCATATATAACGGA  |
| 58 | TCACAATCGTAGCACC ATTACCATCGTTTTCA  |
| 59 | ATACCCAAGATAACCC ACAAGAATAAACGATT  |
| 60 | ATCAGAGAAAGAACTG GCATGATTTTATTTTG  |
| 61 | TTTTGTTTAAGCCTTA AATCAAGAATCGAGAA  |
| 62 | AGGTTTTGAACGTCAA AAATGAAAGCGCTAAT  |
| 63 | CAAGCAAGACGCGCCT GTTTATCAAGAATCGC  |
| 64 | AATGCAGACCGTTTTT ATTTTCATCTTGCGGG  |
| 65 | CATATTTAGAAATACC GACCGTGTTACCTTTT  |
| 66 | AATGGTTTACAACGCC AACATGTAGTTCAGCT  |
| 67 | TAACCTCCATATGTGA GTGAATAAACAAAATC  |
| 68 | AAATCAATGGCTTAGG TTGGGTTACTAAATTT  |
| 69 | GCGCAGAGATATCAAA ATTATTTGACATTATC  |
| 70 | AACCTACCGCGAATTA TTCATTTCCAGTACAT  |
| 71 | ATTTTGCGTCTTTAGG AGCACTAAGCAACAGT  |
| 72 | CTAAATAGAACAAAG AAACCACCAGGGTTAG   |
| 73 | GCCACGCTATACGTGG CACAGACAACGCTCAT  |
| 74 | GCGTAAGAGAGAGCCA GCAGCAAAAAGGTTAT  |
| 75 | GGAAATACCTACATTT TGACGCTCACCTGAAA  |
| 76 | TATCACCGTACTCAGG AGGTTTAGCGGGGTTT  |
| 77 | TGCTCAGTCAGTCTCT GAATTTACCAGGAGGT  |
| 78 | GGAAAGCGACCAGGCG GATAAGTGAATAGGTG  |
| 79 | TGAGGCAGGCGTCAGA CTGTAGCGTAGCAAGG  |
| 80 | TGCCTTTAGTCAGACG ATTGGCCTGCCAGAAT  |
| 81 | CCGGAAACACACCACG GAATAAGTAAGACTCC  |
| 82 | ACGCAAAGGTCACCAA TGAAACCAATCAAGTT  |
| 83 | TTATTACGGTCAGAGG GTAATTGAATAGCAGC  |
| 84 | TGAACAAACAGTATGT TAGCAAATAAAAGAA   |
| 85 | CTTTACAGTTAGCGAA CCTCCCGACGTAGGAA  |
| 86 | GAGGCGTTAGAGAATA ACATAAAAGAACACCC  |
| 87 | TCATTACCCGACAATA AACAACATATTTAGGC  |

|     |                                                      |
|-----|------------------------------------------------------|
| 88  | CCAGACGAGCGCCCAA TAGCAAGCAAGAACGC                    |
| 89  | AGAGGCATAATTTTCAT CTTCTGACTATAACTA                   |
| 90  | TTTTAGTTTTTCGAGC CAGTAATAAATTCTGT                    |
| 91  | TATGTAAACCTTTTTT AATGAAAAATTACCT                     |
| 92  | TTGAATTATGCTGATG CAAATCCACAAATATA                    |
| 93  | GAGCAAAAACTTCTGA ATAATGGAAGAAGGAG                    |
| 94  | TGGATTATGAAGATGA TGAAACAAAATTTTCAT                   |
| 95  | CGGAATTATTGAAAGG AATTGAGGTGAAAAAT                    |
| 96  | ATCAACAGTCATCATA TTCCTGATTGATTGTT                    |
| 97  | CTAAAGCAAGATAGAA CCCTTCTGAATCGTCT                    |
| 98  | GCCAACAGTCACCTTG CTGAACCTGTTGGCAA                    |
| 99  | GAAATGGATTATTTAC ATTGGCAGACATTCTG                    |
| 101 | AGGGTTGA TTTT ATAAATCC TCATTAAATGATATTC              |
| 102 | ACAAACAA TTTT AATCAGTA GCGACAGATCGATAGC              |
| 103 | AGCACCGT TTTT TAAAGGTG GCAACATAGTAGAAAA              |
| 104 | TACATACA TTTT GACGGGAG AATTAACACAGGGAA               |
| 106 | TATAGAAG TTTT CGACAAAA GGTAAGTAGAGAATA               |
| 107 | TAAAGTAC TTTT CGCGAGAA AACTTTTTATCGCAAG              |
| 108 | ACAAAGAA TTTT ATTAATTA CATTTAACACATCAAG              |
| 109 | AAAACAAA TTTT TTCATCAA TATAATCCTATCAGAT              |
| 110 | GATGGCAA TTTT AATCAATA TCTGGTCACAAATATC              |
| 111 | AAACCCTC TTTT ACCAGTAA TAAAAGGGATTACCA GTCACACG TTTT |
| 112 | CCGAAATCCGAAAATC CTGTTTGAAGCCGGAA                    |
| 113 | CCAGCAGGGGCAAAAT CCCTTATAAAGCCGGC                    |
| 114 | GCATAAAGTTCCACAC AACATACGAAGCGCCA                    |
| 115 | GCTCACAATGTAAAGC CTGGGGTGGGTTTGCC                    |
| 116 | TTCGCCATTGCCGGAA ACCAGGCATTAAATCA                    |
| 117 | GCTTCTGGTCAGGCTG CGCAACTGTGTTATCC                    |
| 118 | GTTAAAATTTTAACCA ATAGGAACCCGGCACC                    |
| 119 | AGACAGTCATTCAAAA GGGTGAGAAGCTATAT                    |
| 120 | AGGTAAAGAAATCACC ATCAATATAATATTTT                    |
| 121 | TTTCATTTGGTCAATA ACCTGTTTATATCGCG                    |
| 122 | TCGCAAATGGGGCGCG AGCTGAAATAATGTGT                    |
| 123 | TTTTAATTGCCCCGAAA GACTTCAAAACACTAT                   |
| 124 | AAGAGGAACGAGCTTC AAAGCGAAGATACATT                    |
| 125 | GGAATTACTCGTTTAC CAGACGACAAAAGATT                    |
| 126 | GAATAAGGACGTAACA AAGCTGCTCTAAAACA                    |
| 127 | CCAAATCACTTGCCCT GACGAGAACGCCAAAA                    |
| 128 | CTCATCTTGAGGCAAA AGAATACAGTGAATTT                    |
| 129 | AAACGAAATGACCCCC AGCGATTATTCATTAC                    |
| 130 | CTTAAACATCAGCTTG CTTTCGAGCGTAACAC                    |
| 131 | TCGGTTTAGCTTGATA CCGATAGTCCAACCTA                    |
| 132 | TGAGTTTCGTCACCAG TACAACTTAATTGTA                     |
| 134 | GAATAGCCGCAAGCGG TCCACGCTCCTAATGA                    |



|     |                                    |
|-----|------------------------------------|
| 135 | GAGTTGCACGAGATAG GGTGAGTAAGGGAGC   |
| 136 | GTGAGCTAGTTTCCTG TGTGAAATTTGGGAAG  |
| 137 | TCATAGCTACTCACAT TAATTGCGCCCTGAGA  |
| 138 | GGCGATCGCACTCCAG CCAGCTTTGCCATCAA  |
| 139 | GAAGATCGGTGCGGGC CTCTTCGCAATCATGG  |
| 140 | AAATAATTTTAAATTG TAAACGTTGATATTCA  |
| 141 | GCAAATATCGCGTCTG GCCTTCCTGGCCTCAG  |
| 142 | ACCGTTCTAAATGCAA TGCCTGAGAGGTGGCA  |
| 143 | TATATTTTAGCTGATA AATTAATGTTGTATAA  |
| 144 | TCAATTCCTTTAGTTT GACCATTACCAGACCG  |
| 145 | CGAGTAGAACTAATAG TAGTAGCAAACCCTCA  |
| 146 | GAAGCAAAAAAGCGGA TTGCATCAGATAAAAA  |
| 147 | TCAGAAGCCTCCAACA GGTCAGGATCTGCGAA  |
| 148 | CCAAAATATAATGCAG ATACATAAACACCAGA  |
| 149 | CATTCAACGCGAGAGG CTTTTGCATATTATAG  |
| 150 | ACGAGTAGTGACAAGA ACCGGATATACCAAGC  |
| 151 | AGTAATCTTAAATTGG GCTTGAGAGAATACCA  |
| 152 | GCGAAACATGCCACTA CGAAGGCATGCGCCGA  |
| 153 | ATACGTAAAAGTACAA CGGAGATTTTATCAAG  |
| 155 | AAAAAAGGACAACCAT CGCCCACGCGGGTAAA  |
| 156 | TGTAGCATTCCACAGA CAGCCCTCATCTCCAA  |
| 157 | GTAAAGCACTAAATCG GAACCCTAGTTGTTCC  |
| 158 | AGTTTGGAGCCCTTCA CCGCCTGGTTGCGCTC  |
| 159 | AGCTGATTACAAGAGT CCACTATTGAGGTGCC  |
| 160 | ACTGCCCGCCGAGCTC GAATTCGTTATTACGC  |
| 161 | CCCGGGTACTTTCCAG TCGGGAAACGGGCAAC  |
| 162 | CAGCTGGCGGACGACG ACAGTATCGTAGCCAG  |
| 163 | GTTTGAGGGAAAGGGG GATGTGCTAGAGGATC  |
| 164 | CTTTCATCCCCAAAAA CAGGAAGACCGGAGAG  |
| 165 | AGAAAAGCAACATTAA ATGTGAGCATCTGCCA  |
| 166 | GGTAGCTAGGATAAAA ATTTTATAGTTAACATC |
| 167 | CAACGCAATTTTGGAG AGATCTACTGATAATC  |
| 168 | CAATAAATACAGTTGA TTCCCAATTTAGAGAG  |
| 169 | TCCATATACATACAGG CAAGGCAACTTTATTT  |
| 170 | TACCTTTAAGGTCTTT ACCCTGACAAAGAAGT  |
| 171 | CAAAAATCATTGCTCC TTTTGATAAGTTTCAT  |
| 172 | TTTGCCAGATCAGTTG AGATTTAGTGTTTAA   |
| 173 | AAAGATTCAGGGGGTA ATAGTAAACCATAAAT  |
| 174 | TTTCAACTATAGGCTG GCTGACCTTGATCAT   |
| 175 | CCAGGCGCTTAATCAT TGTGAATTACAGGTAG  |
| 176 | CGCCTGATGGAAGTTT CCATTAAACATAACCG  |
| 177 | TTTCATGAAAATTGTG TCGAAATCTGTACAGA  |
| 178 | ATATATTCTTTTTTCA CGTTGAAAATAGTTAG  |
| 179 | AATAATAAGGTCGCTG AGGCTTGCAAAGACTT  |

|       |                                         |
|-------|-----------------------------------------|
| 180   | CGTAACGATCTAAAGT TTTGTCGTGAATTGCG       |
| 181   | ACCCAAATCAAGTTTT TTGGGGTCAAAGAACG       |
| 182   | TGGACTCCCTTTTTCAC CAGTGAGACCTGTCGT      |
| 183   | TGGTTTTTAACGTCAA AGGGCGAAGAACCATC       |
| 184   | GCCAGCTGCCTGCAGG TCGACTCTGCAAGGCG       |
| 185   | CTTGCATGCATTAATG AATCGGCCCGCCAGGG       |
| 186   | ATTAAGTTCGCATCGT AACCGTGCGAGTAACA       |
| 187   | TAGATGGGGGGTAACG CCAGGGTTGTGCCAAG       |
| 188   | ACCCGTCGTCATATGT ACCCCGGTAAAGGCTA       |
| 189   | CATGTCAAGATTCTCC GTGGGAACCGTTGGTG       |
| 190   | TCAGGTCACTTTTGCG GGAGAAGCAGAATTAG       |
| 191   | CTGTAATATTGCCTGA GAGTCTGGAAAAGTAG       |
| 192   | CAAAATTAAAGTACGG TGTCTGGAAGAGGTCA       |
| 193   | TGCAACTAAGCAATAA AGCCTCAGTTATGACC       |
| 194   | TTTTTGCGCAGAAAAC GAGAATGAATGTTTAG       |
| 195   | AAACAGTTGATGGCTT AGAGCTTATTTAAATA       |
| 196   | ACTGGATAACGGAACA ACATTATTACCTTATG       |
| 197   | ACGAACTAGCGTCCAA TACTGCGGAATGCTTT       |
| 198   | CGATTTTAGAGGACAG ATGAACGGCGCGACCT       |
| 199   | CTTTGAAAAGAACTGG CTCATTATTTAATAAA       |
| 200   | GCTCCATGAGAGGCTT TGAGGACTAGGGAGTT       |
| 201   | ACGGCTACTTACTTAG CCGGAACGCTGACCAA       |
| 202   | AAAGGCCGAAAGGAAC AACTAAAGCTTTCCAG       |
| 203   | GAGAATAGCTTTTGCG GGATCGTCGGGTAGCA       |
| 204   | ACGTTAGTAAATGAAT TTTCTGTAAGCGGAGT       |
| 205   | TTTT CGATGGCC CACTACGTAAACCGTC          |
| 206   | TATCAGGG TTTT CGGTTTGC GTATTGGGAACGCGCG |
| 207   | GGGAGAGG TTTT TGTA AAC GACGGCCATTCCCAGT |
| 208   | CACGACGT TTTT GTAATGGG ATAGGTCAAACGCGCG |
| 209   | GATTGACC TTTT GATGAACG GTAATCGTAGCAAACA |
| 210   | AGAGAATC TTTT GGTTGTAC CAAAACAAGCATAAA  |
| 212   | ATATAATG TTTT CATTGAAT CCCCTCAAATCGTCA  |
| 213   | TAAATATT TTTT GGAAGAAA AATCTACGACCAGTCA |
| 214   | GGACGTTG TTTT TCATAAGG GAACCGAAAGGCGCAG |
| 215   | ACGGTCAA TTTT GACAGCAT CGGAACGAACCCTCAG |
| Loop1 | AACATCACTTGCCTGAGTAGAAGAACT             |
| Loop2 | TGTAGCAATACTTCTTTGATTAGTAAT             |
| Loop3 | AGTCTGTCCATCACGCAAATTAACCGT             |
| Loop4 | ATAATCAGTGAGGCCACCGAGTAAAAG             |
| Loop5 | ACGCCAGAATCCTGAGAAGTGTTTTT              |
| Loop6 | TTAAAGGGATTTTAGACAGGAACGGT              |
| Loop7 | AGAGCGGGAGCTAAACAGGAGGCCGA              |
| Loop8 | TATAACGTGCTTTCCTCGTTAGAATC              |
| Loop9 | GTACTATGGTTGCTTTGACGAGCACG              |

|        |                            |
|--------|----------------------------|
| Loop10 | GCGCTTAATGCGCCGCTACAGGGCGC |
|--------|----------------------------|

Table S2. Mismatched bases sequence used to test SGI dyes

|                    |                    |
|--------------------|--------------------|
| ssDNA              | ACACACACACACACACAC |
| Complementary DNA  | GTGTGTGTGTGTGTGTGT |
| 1 mismatched bases | ACACACACACTCACACAC |
| 3 mismatched bases | ACACTCACACTCACTCAC |
| 5 mismatched bases | ACACTCTCACTCACTCTC |
| 7 mismatched bases | ACTCTCTCACTCTCTCTC |
| 9 mismatched bases | ACTCTCTCTCTCTCTCTC |
